# Supplementary material
Source: PubMed Central journal article supplement (PMC2645954)
Supplement: NIHMS67614-supplement-Supporting_Inf.pdf [file NIHMS67614-supplement-Supporting_Inf.pdf]

# Chemical Activation of Lipoplexes Formed from DNA and a Redox-Active, Ferrocene-Containing Cationic Lipid

Christopher M. Jewell,<sup>1</sup> Melissa E. Hays,<sup>1</sup> Yukishige Kondo,<sup>2</sup> Nicholas L. Abbott,<sup>1,\*</sup> and David M. Lynn<sup>1,\*</sup>

<sup>1</sup>Department of Chemical and Biological Engineering, University of Wisconsin – Madison, 1415 Engineering Drive, Madison, Wisconsin 53706, <sup>2</sup>Department of Industrial Chemistry, Tokyo University of Science, Tokyo, Japan

## Supporting Information

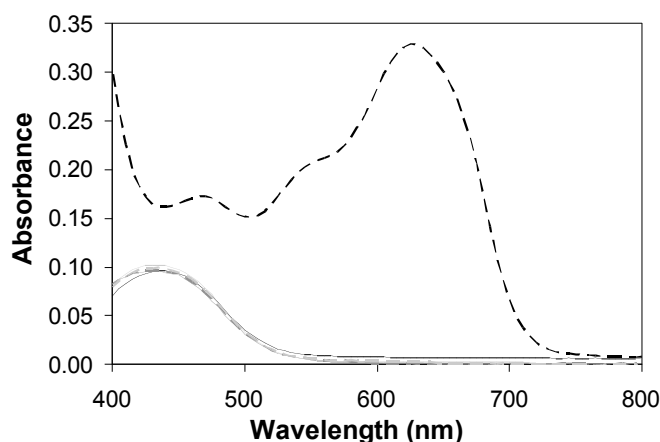

**Figure S1:** UV/visible absorbance spectra for solutions of reduced BFDMA (dark solid line) or oxidized BFDMA (dark dashed line). Also shown are spectra corresponding to solutions of oxidized BFDMA treated with GSH at a 50-fold excess (dark grey solid line), 30-fold excess (dark grey dashed line), 20-fold excess (light grey solid line), and 10-fold excess (light grey dashed line). See Experimental Section of main text for experimental details.

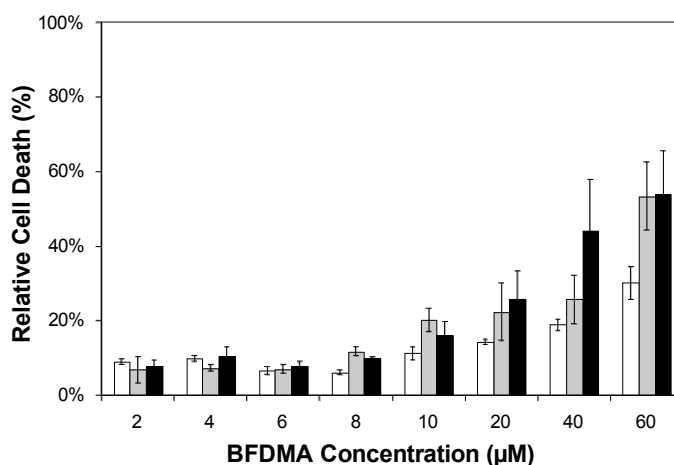

**Figure S2:** Relative cell death in COS-7 cells resulting from exposure to lipoplexes formed from reduced BFDMA (white bars), oxidized BFDMA (grey bars), and oxidized lipoplexes treated with a 20-fold excess of GSH prior to addition to cells (black bars). Experiments were performed in Opti-MEM with an exposure time of 4 h, and data correspond to luciferase expression data shown in Figure 4. See experimental section of main text for experimental details.
